# Supplementary material for: TAK1 mediates microenvironment-triggered autocrine signals and promotes triple-negative breast cancer lung metastasis
Source: PubMed Central journal article supplement (PMC5959931; doi:10.1038/s41467-018-04460-w), 2018-05-18
Supplement: 41467_2018_4460_MOESM1_ESM.pdf [file 41467_2018_4460_MOESM1_ESM.pdf]

Supplementary information

**TAK1 mediates microenvironment-triggered autocrine signals and promotes triple-negative breast cancer lung metastasis**

Iriondo et al.

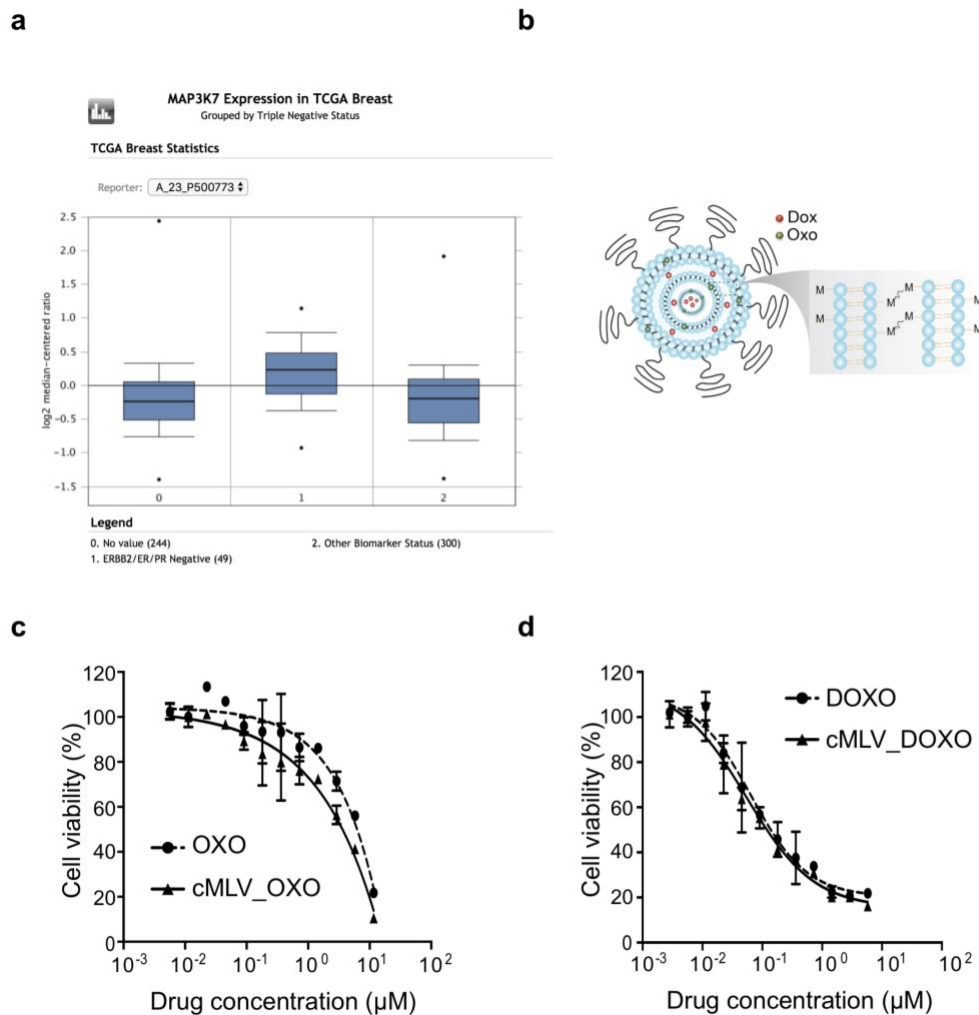

**Supplementary Figure 1:** Extended data related to Figure 1. **a** Oncomine analysis of mRNA expression levels of *TAK1* (*MAP3K7*) in breast tumors of the TCGA dataset, grouped by triple negative status. **b** Schematic representation of a crosslinked multilamellar vesicle encapsulating doxorubicin (Doxo) and 5Z-7-Oxozeaenol (Oxo). **c-d**) Viability of MDA-MB-231 cells treated with different concentrations of free or nanoparticle encapsulated 5Z-7-Oxozeaenol (cMLV\_OXO) (**c**) or doxorubicin (cMLV\_DOXO) (**d**). Means  $\pm$  SD of 3 independent measurements are shown.

**a**

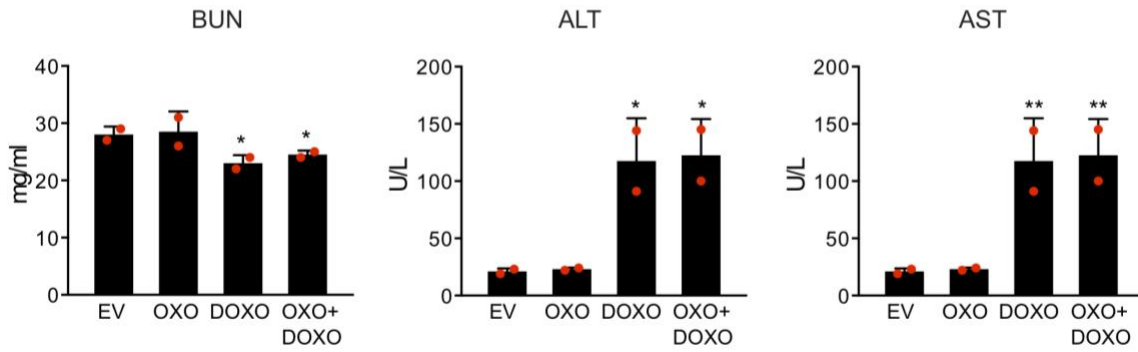

**b**

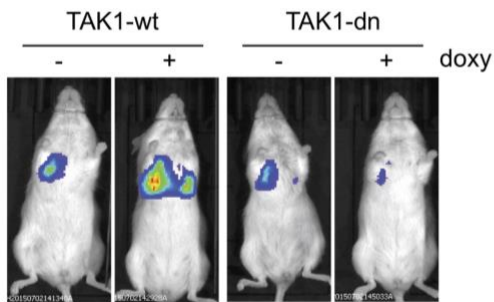

**Supplementary Figure 2:** Extended data related to Figure 2. **a** Blood urea nitrogen (BUN), alanine aminotransferase (ALT), and aspartate aminotransferase (AST) test results showing significant changes associated with doxorubicin treatment, but not with 5Z-7-Oxozeaenol treatment. Graphs show means  $\pm$  SD from 2 mice. Unpaired 1-tailed Student's t test. \* $p \leq 0.05$  \*\* $p \leq 0.01$ . **b** Representative bioluminescent images of mice injected with cells overexpressing doxycycline inducible TAK1-wt and TAK1-dn with or without treatment of doxycycline.

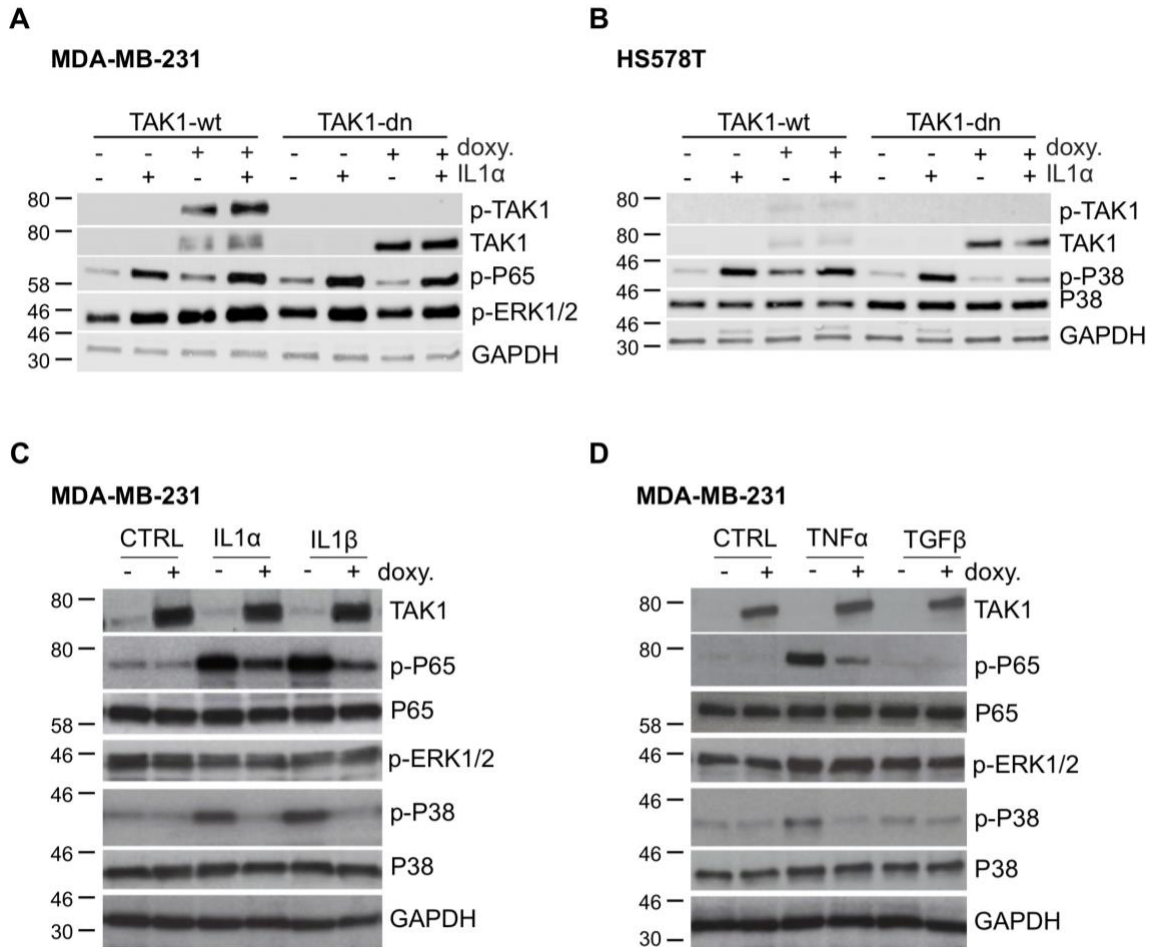

**Supplementary Figure 3:** Extended data related to Figure 3. **a** Changes in P65 and ERK1/2 phosphorylation in response to IL1 $\alpha$  stimulation in MDA-MB-231 cells overexpressing wt-TAK1 or dn-TAK1 in a doxycycline dependent manner. **b** P38 phosphorylation levels in HS578T cells overexpressing inducible wt-TAK1 or dn-TAK1 with or without treatment of doxycycline and/or IL1 $\alpha$ . In **(a)** and **(b)**, cells were plated in suspension in FBS-free media. **c-d** Changes in P65, ERK1/2 and P38 phosphorylation in MDA-MB-231 cells overexpressing doxycycline-inducible dn-TAK1 in response to IL1 $\alpha$  and IL1 $\beta$  **(C)** and TNF $\alpha$  and TGF $\beta$  **(d)**. In this case, cells were cultured in adherent condition using media containing FBS. Representative examples of 3 experiments are shown.

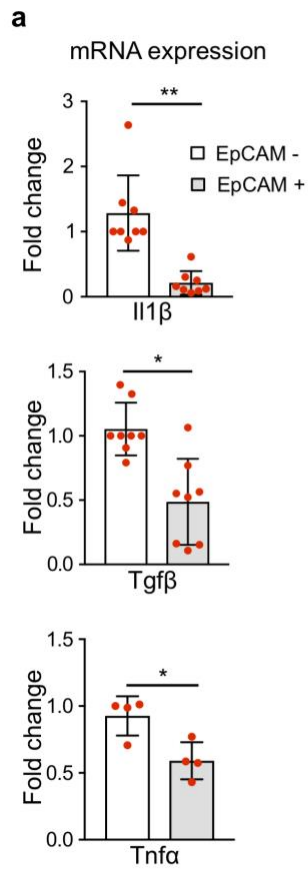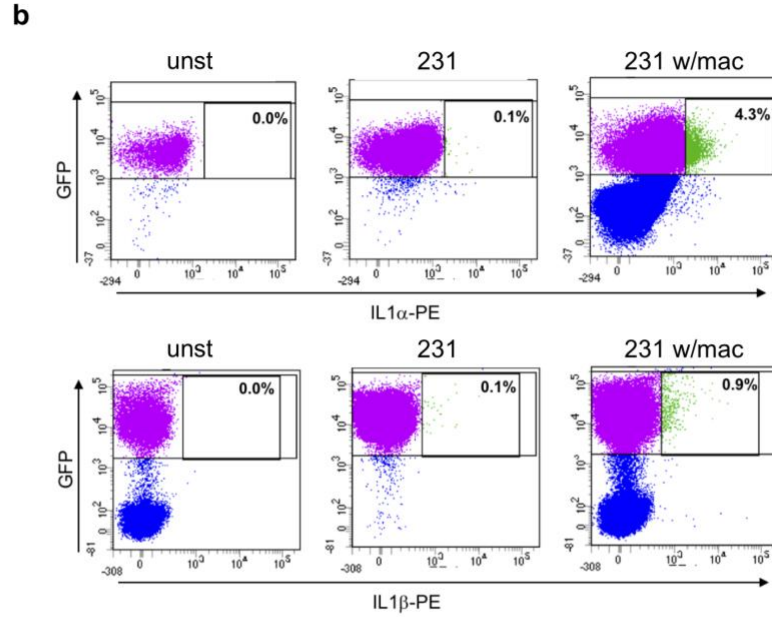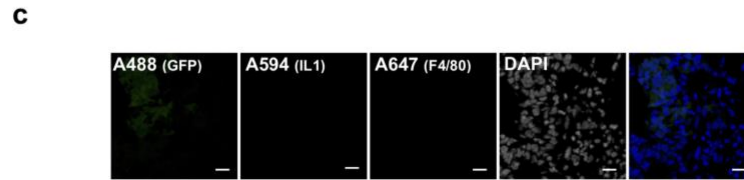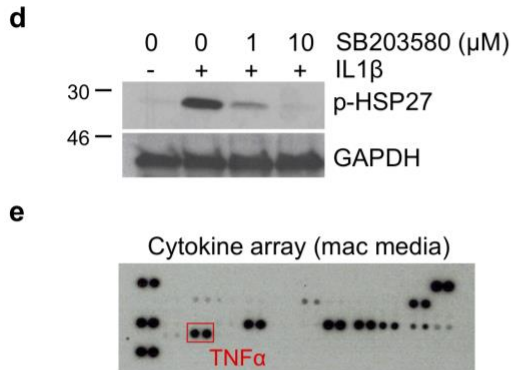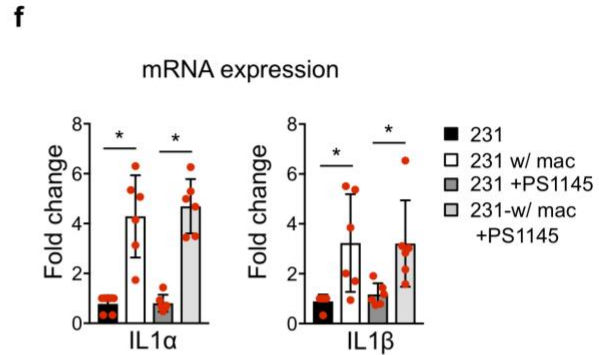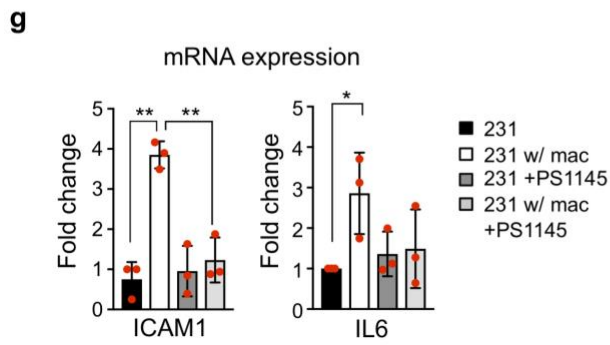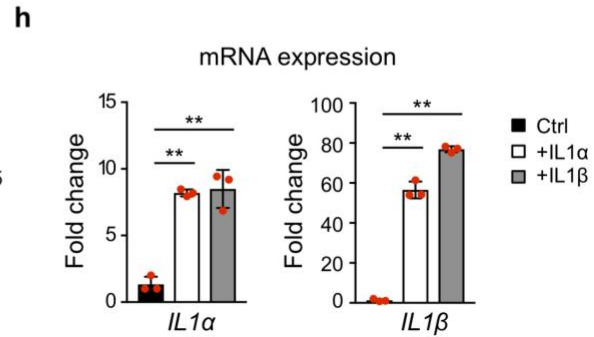

**Supplementary Figure 4:** Extended data related to Figure 4. **a** qPCR analysis of *IL1 $\beta$* , *TGF $\beta$*  and *TNF $\alpha$*  expression in epithelial and stromal cells isolated from lungs of NSG mice based on EpCAM expression. **b** Representative examples of 6 (*IL1 $\alpha$* ) or 5 (*IL1 $\beta$* ) intracellular flow cytometry experiments showing percentage of *IL1 $\alpha$* - (top panels) and *IL1 $\beta$* -positive cells (bottom panels) in GFP-tagged MDA-MB-231 cells culture alone or with macrophages. **c** Secondary antibody only controls for the immunofluorescence experiments shown in Fig. 4d. Scale bar = 20  $\mu$ m. **d** Western blot showing *IL1 $\beta$* -induced phosphorylation of the P38 target HSP27 in cells cultured with or without the P38 inhibitor SB203580. Cells were cultured in the presence of SB203580 for 3 days, while *IL1 $\beta$*  was added for the last 10 minutes. A representative example of 2 experiments is shown. **e** Cytokine array performed using media from macrophages cultured for 2 days. Highlighted in the red box are 2 spots for *TNF $\alpha$* . **f** qPCR analysis of *IL1 $\alpha$*  and *IL1 $\beta$*  expression in MDA-MB-231-GFP cells cultured in the presence or absence of macrophages with or without treatment of 2 $\mu$ M PS1145. **g** qPCR analysis of mRNA expression levels of NF $\kappa$ B targets *ICAM1* and *IL6* in MDA-MB-231 cells cultured as in **f**. In **f** and **g**, RNA was extracted from cells separated by FACS sorting based on GFP expression. **h** qPCR analysis of *IL1 $\alpha$*  and *IL1 $\beta$*  expression in MDA-MB-231 cells treated with 10 nM *IL1 $\alpha$*  or 10 nM *IL1 $\beta$*  for 24 hours. Graphs show means and SD of 3 (**g** and **h**), 4 (**a** - *Tnf $\alpha$* ), 5 (**f**) and 8 (**a** - *IL1 $\beta$*  and *Tgf $\beta$* ) experiments. Statistical analyses: unpaired 2-tailed Student's t test (**a**, **f**, **g** and **h**). \* $p \leq 0.05$ , \*\* $p \leq 0.01$

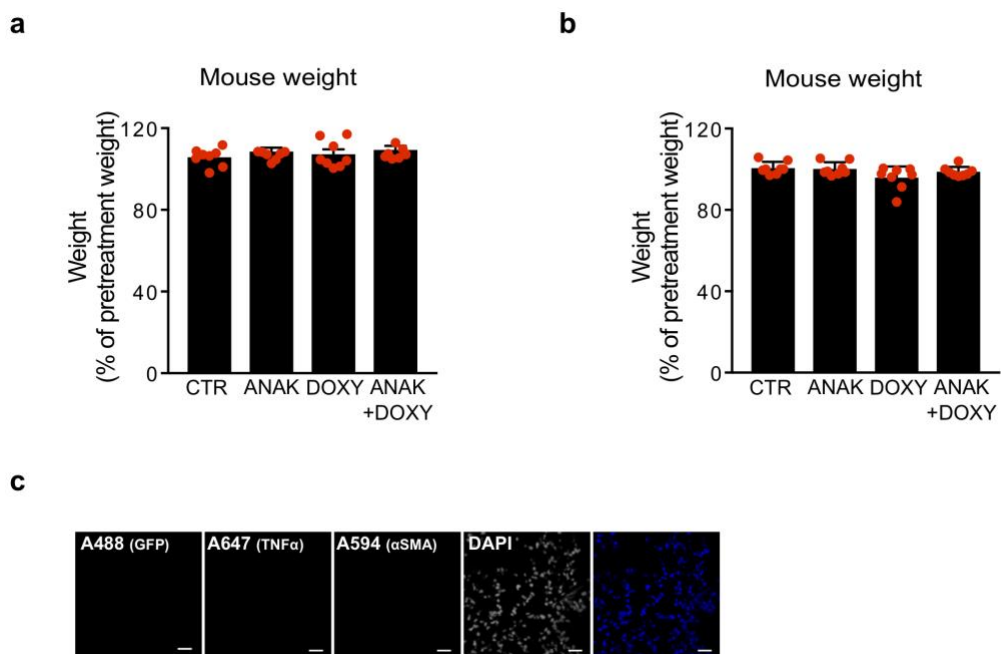

**Supplementary Figure 5:** Extended data related to Figure 5. **a-b** Change in weight of mice injected with MDA-MB-231 (**a**) or 4T1 (**b**) cells and treated with anakinra, doxycycline, or the combination of both. For each mouse, change in weight was calculated by comparing the weight at the end of the experiment with the weight on the day that treatment with anakinra and/or doxycycline started. Means and SD of 8 (**a**) and 7 (**b**) mice are shown. **c** Secondary antibody only controls for the immunofluorescence experiment shown in Fig. 5f. Scale bar = 20  $\mu$ m.

Fig. 2c

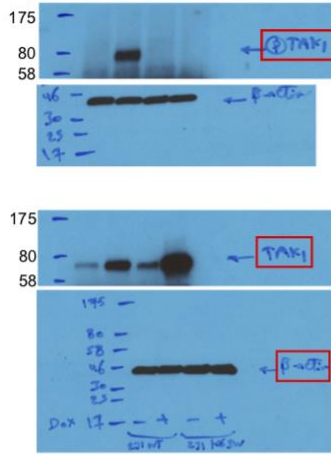

Fig. 3a

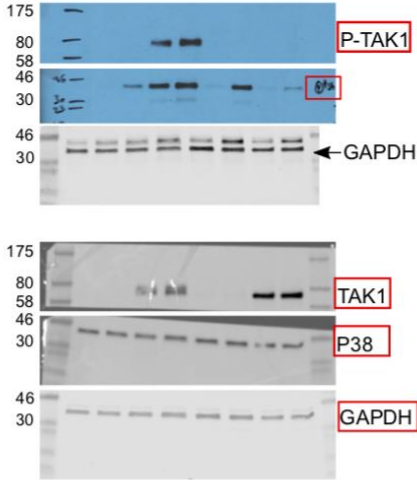

Fig. 3b

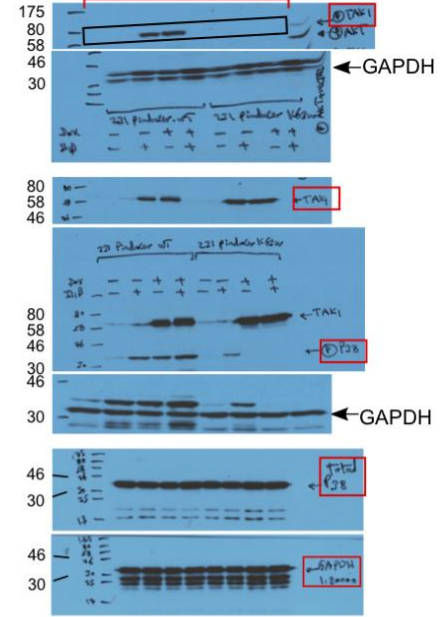

Fig. 3c

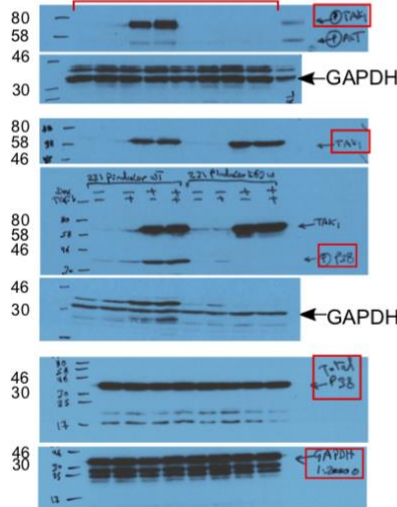

Fig. 3d

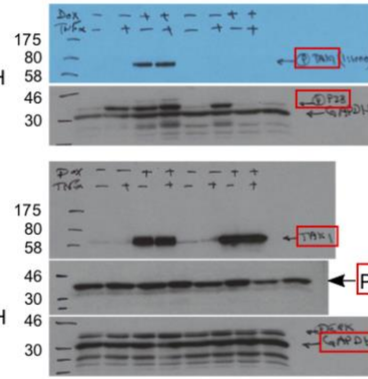

Fig. 3e

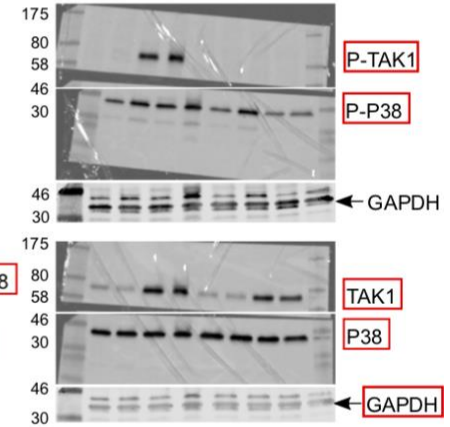

Fig. 5a

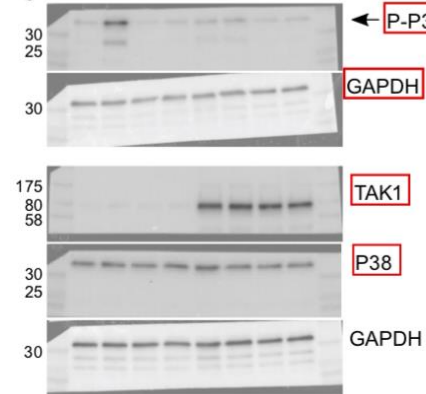

Fig. 5c

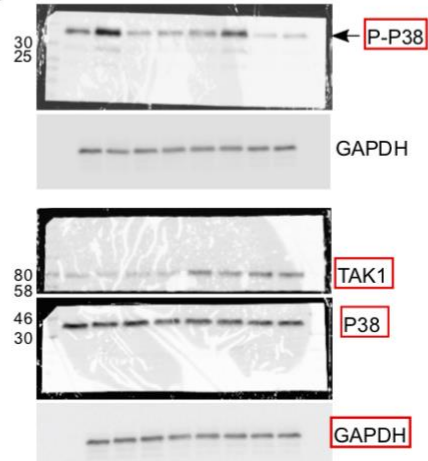



**Supplementary Figure 6:** Uncropped western blots from Fig. 2, Fig. 3 and Fig. 5. For each experiment, the same protein extracts were loaded into several gels. Loading controls for all blots are shown here, while for main figures one loading control (marked here with red square) was chosen, for clarity.

**Supplementary Table 1:** List of primary antibodies used in the study

| <b>Antigen</b> | <b>Clone</b>   | <b>Vendor and Cat. No.</b> | <b>Fluorochrome</b> | <b>Assay and dilution</b> |
|----------------|----------------|----------------------------|---------------------|---------------------------|
| p-TAK1         | Rb, polyclonal | Cell Signaling, 4531       | -                   | WB, 1:1000                |
| TAK1           | Rb, polyclonal | Cell Signaling, 4505       | -                   | WB, 1:1000                |
| p-P38          | Rb, polyclonal | Cell Signaling, 9211       | -                   | WB, 1:1000                |
| P38            | Rb, polyclonal | Cell Signaling, 9212       | -                   | WB, 1:1000                |
| p-P65          | Rb, 93H1       | Cell Signaling, 3033       | -                   | WB, 1:1000                |
| P65            | Ms, L8F6       | Cell Signaling, 6956       | -                   | WB, 1:1000                |
| p-ERK1/2       | Rb, 20G11      | Cell Signaling, 4376       | -                   | WB, 1:1000                |
| p-HSP27        | Rb, D1H2F6     | Cell Signaling, 9709       | -                   | WB, 1:1000                |
| $\beta$ -ACTIN | Ms, AC-15      | Sigma, A5441               | -                   | WB, 1:20000               |
| GAPDH          | Rb, polyclonal | Millipore, ABS16           | -                   | WB, 1:20000               |
| IL1 $\alpha$   | Rb, polyclonal | Abcam, ab7632              | -                   | IF, 1:100                 |
| IL1 $\beta$    | Rb, polyclonal | Abcam, ab9722              | -                   | IF, 1:100                 |
| F4/80          | Rat, Cl:A3-1   | Biorad, MCA497GA           | -                   | IF, 1:200                 |
| GFP            | Ch, polyclonal | Abcam, ab13970             | -                   | IF, 1:500                 |
| TNF $\alpha$   | Rb, polyclonal | Sigma, SAB4502982          | -                   | IF, 1:200                 |
| $\alpha$ SMA   | Gt, polyclonal | Abcam, ab21027             | -                   | IF, 1:100                 |
| IL1 $\alpha$   | Ms, 364-3B3-14 | Biologend, 500107          | PE                  | IFC, 1:50                 |
| IL1 $\beta$    | Ms, CRM56      | Ebioscience, 12-7018-81    | PE                  | IFC, 1:100                |

Abbreviations: Rb: Rabbit, Ms: Mouse, Ch: Chicken, Gt: Goat, WB: Western Blot, IF: Immunofluorescence, IFC: Intracellular Flow Cytometry, PE: Phycoerythrin.

**Supplementary Table 2:** List of secondary antibodies used in the study

| <b>Specificity</b> | <b>Host</b> | <b>Vendor and Cat. No.</b>          | <b>Conjugation</b> | <b>Assay and dilution</b> |
|--------------------|-------------|-------------------------------------|--------------------|---------------------------|
| Mouse              | Goat        | Biorad, 1706516                     | HRP                | WB, 1:3000                |
| Rabbit             | Donkey      | Jackson ImmunoResearch              | HRP                | WB, 1:2000                |
| Chicken            | Goat        | Life Technologies, A11039           | Alexa 488          | IF, 1:500                 |
| Rabbit             | Goat        | Life Technologies, A11012           | Alexa 594          | IF, 1:500                 |
| Rat                | Goat        | Life Technologies, A21247           | Alexa 647          | IF, 1:500                 |
| Chicken            | Donkey      | Jackson ImmunoResearch, 703-545-155 | Alexa 488          | IF, 1:500                 |
| Rabbit             | Donkey      | Life Technologies, A-31573          | Alexa 647          | IF, 1:500                 |
| Goat               | Donkey      | Life Technologies, A11058           | Alexa 594          | IF, 1:500                 |

Abbreviations: WB: Western Blot, IF: Immunofluorescence.

**Supplementary Table 3:** list of qPCR primers used in this study

| Gene         | Specificity | Sequence                |                        |
|--------------|-------------|-------------------------|------------------------|
|              |             | Forward (5'→3')         | Reverse (5'→3')        |
| 36B4         | human       | GTGTTTCGACAATGGCAGCAT   | AGACACTGGCAACATTGCGGA  |
| IL1 $\alpha$ | human       | GAATGACGCCCTCAATCAAAGT  | TCATCTTGGGCAGTCACATACA |
| IL1 $\beta$  | human       | TCGAGGCACAAGGCACAAC     | TGTTTAGGGCCATCAGCTTCA  |
| TGF $\beta$  | human       | CGACTCGCCAGAGTGGTTAT    | CGGTAGTGAACCCGTTGATGT  |
| TNF $\alpha$ | human       | GAGGCCAAGCCCTGGTATG     | CGGGCCGATTGATCTCAGC    |
| ICAM1        | human       | ACGCTGAGCTCCTCTGCTACTC  | GGGCAGGATGACTTTTGAGG   |
| IL6          | human       | CCTCGACGGCATCTCAGCCCT   | TCTGCCAGTGCCTCTTTGCTGC |
| 36B4         | mouse       | CTCGTTGGAGTGACATCGTCT   | GTCTGCTCCCACAATGAAGC   |
| IL1 $\alpha$ | mouse       | AGTCAACTCATTGGCGCTTG    | CAGAGAGAGATGGTCAATGGCA |
| IL1 $\beta$  | mouse       | TTCAGGCAGGCAGTATCACTC   | CATCCCATGAGTCACAGAG    |
| TGF $\beta$  | mouse       | CTTCAATACGTCAGACATTCGGG | GTAACGCCAGGAATTGTTGCTA |
| TNF $\alpha$ | mouse       | GTGATCGGTCCCCAAAGG      | TGGTGGTTTGTGAGTGTGAGG  |
